# Supplementary material for: Comprehensive Molecular Characterization of the Mitochondrial Genome of the Takin Lungworm Varestrongylus eleguneniensis (Strongylida: Protostrongylidae)
Source: MDPI journal article supplement (doi:10.3390/ijms232113597), 2022-11-06
Supplement: s1 [file s1]

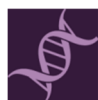

**Table S1.** Nucleotide contents of the mtDNAs of the forty-five Strongylida nematodes.

| Species                                 | GenBank Nos. | Whole Genome |      |      |     |      |
|-----------------------------------------|--------------|--------------|------|------|-----|------|
|                                         |              | A%           | T%   | G%   | C%  | A+T% |
| <i>Ancylostoma caninum</i>              | NC_012309    | 29.0         | 48.5 | 16.1 | 6.5 | 77.5 |
| <i>Ancylostoma ceylanicum</i>           | AP017674     | 30.6         | 47.9 | 15.0 | 6.4 | 78.5 |
| <i>Ancylostoma duodenale</i>            | NC_003415    | 28.3         | 48.4 | 16.7 | 6.6 | 76.7 |
| <i>Ancylostoma tubaeforme</i>           | NC_034289    | 29.2         | 48.5 | 15.6 | 6.7 | 77.7 |
| <i>Aelurostrongylus abstrusus</i>       | NC_019571    | 21.3         | 50.6 | 21.1 | 7.0 | 71.9 |
| <i>Angiostrongylus cantonensis</i>      | AP017672     | 24.5         | 48.7 | 20.7 | 6.1 | 73.2 |
| <i>Angiostrongylus costaricensis</i>    | AP017675     | 26.7         | 48.2 | 18.8 | 6.3 | 74.9 |
| <i>Angiostrongylus vasorum</i>          | NC_018602    | 21.5         | 47.6 | 24.7 | 6.1 | 69.1 |
| <i>Chabertia erschowi</i>               | NC_023782    | 28.3         | 46.0 | 17.8 | 7.8 | 74.3 |
| <i>Chabertia ovina</i>                  | GQ888721     | 29.6         | 46.7 | 16.3 | 7.4 | 76.3 |
| <i>Hypodontus macropi</i>               | KF361317     | 29.3         | 46.9 | 16.1 | 6.5 | 76.2 |
| <i>Macropicola ocydromi</i>             | KF361320     | 29.4         | 46.4 | 17.4 | 7.2 | 75.8 |
| <i>Oesophagostomum asperum</i>          | KC715826     | 30.2         | 47.5 | 15.4 | 6.9 | 77.7 |
| <i>Oesophagostomum columbianum</i>      | KC715827     | 29.6         | 48.1 | 15.0 | 7.2 | 77.7 |
| <i>Oesophagostomum quadrispinulatum</i> | FM161883     | 30.7         | 46.8 | 15.2 | 7.3 | 77.5 |
| <i>Oesophagostomum dentatum</i>         | FM161882     | 21.0         | 51.2 | 17.0 | 7.2 | 72.2 |
| <i>Cooperia oncophora</i>               | AY265417     | 30.1         | 47.3 | 16.1 | 6.5 | 77.4 |
| <i>Dictyocaulus eckerti</i>             | NC_019809    | 24.9         | 51.6 | 17.4 | 6.3 | 76.5 |
| <i>Dictyocaulus viviparus</i>           | NC_019810    | 24.6         | 51.8 | 17.3 | 6.3 | 76.4 |
| <i>Parafilaroides normani</i>           | KJ801815     | 21.0         | 51.2 | 21.2 | 6.5 | 72.2 |
| <i>Haemonchus placei</i>                | AP017687     | 34.1         | 45.2 | 14.5 | 6.2 | 79.3 |
| <i>Mecistocirrus digitatus</i>          | NC_013848    | 34.0         | 45.7 | 14.4 | 5.9 | 79.7 |
| <i>Teladorsagia circumcincta</i>        | GQ888720     | 31.0         | 46.1 | 15.6 | 7.3 | 77.1 |
| <i>Haemonchus contortus</i>             | EU346694     | 33.4         | 44.7 | 15.4 | 6.5 | 78.1 |
| <i>Metastrongylus pudendotectus</i>     | NC_013813    | 26.1         | 51.4 | 16.7 | 5.8 | 77.5 |
| <i>Metastrongylus salmi</i>             | GQ888715     | 23.7         | 50.3 | 14.4 | 5.9 | 74.0 |
| <i>Nematodirus oiratianus</i>           | KF573750     | 28.5         | 47.7 | 16.8 | 7.1 | 76.2 |
| <i>Nematodirus spathiger</i>            | KF573749     | 26.8         | 48.3 | 17.6 | 7.3 | 75.1 |
| <i>Protostrongylus rufescens</i>        | KF481953     | 25.9         | 48.6 | 18.7 | 6.8 | 74.5 |
| <i>Coronocyclus labiatus</i>            | MH551242     | 30.5         | 45.4 | 16.9 | 7.2 | 75.9 |
| <i>Cyathostomum pateratum</i>           | NC_038070    | 30.5         | 45.2 | 16.9 | 7.4 | 75.7 |
| <i>Cylicocyclus ashworthi</i>           | NC_046711    | 30.2         | 45.2 | 17.1 | 7.5 | 75.4 |
| <i>Cylicocyclus insignis</i>            | NC_013808    | 30.6         | 46.0 | 16.6 | 6.8 | 76.6 |
| <i>Cylicocyclus nassatus</i>            | NC_032299    | 29.7         | 45.1 | 17.7 | 7.6 | 74.8 |
| <i>Cylicodontophorus bicoronatus</i>    | MH551241     | 29.9         | 45.3 | 17.4 | 7.4 | 75.2 |
| <i>Poteriostomum imparidentatum</i>     | NC_035005    | 29.8         | 44.9 | 18.0 | 7.4 | 74.7 |
| <i>Strongylus equinus</i>               | KM605251     | 31.1         | 47.0 | 15.7 | 6.2 | 78.1 |
| <i>Strongylus vulgaris</i>              | GQ888717     | 29.3         | 47.2 | 17.8 | 7.0 | 76.5 |
| <i>Triodontophorus brevicauda</i>       | NC_026729    | 31.9         | 45.2 | 16.4 | 7.6 | 77.1 |

---

|                                   |           |      |      |      |     |      |
|-----------------------------------|-----------|------|------|------|-----|------|
| <i>Triodontophorus nipponicus</i> | NC_031517 | 30.8 | 45.2 | 16.4 | 7.6 | 76.0 |
| <i>Triodontophorus serratus</i>   | NC_031516 | 31.8 | 45.4 | 15.9 | 6.9 | 77.2 |
| <i>Cylicostephanus goldi</i>      | AP017681  | 30.5 | 45.6 | 16.8 | 7.1 | 76.1 |
| <i>Syngamus trachea</i>           | NC_013821 | 26.0 | 47.8 | 18.8 | 7.4 | 73.8 |
| <i>Trichostrongylus axei</i>      | NC_013824 | 31.1 | 45.3 | 17.0 | 6.6 | 76.4 |
| <i>Trichostrongylus vitrinus</i>  | NC_013807 | 32.8 | 46.1 | 14.7 | 6.3 | 78.9 |

---

**Table S2.** Gene lengths in the mtDNAs of the forty-five reported Strongylida nematodes.

| Species                                 | GenBank No. | Length(bp)   |             |             |             |             |             |             |             |             |             |              |             |             |             |             |
|-----------------------------------------|-------------|--------------|-------------|-------------|-------------|-------------|-------------|-------------|-------------|-------------|-------------|--------------|-------------|-------------|-------------|-------------|
|                                         |             | Entire mtDNA | <i>atp6</i> | <i>cox1</i> | <i>cox2</i> | <i>cox3</i> | <i>cytb</i> | <i>nad1</i> | <i>nad2</i> | <i>nad3</i> | <i>nad4</i> | <i>nad4L</i> | <i>nad5</i> | <i>nad6</i> | <i>rrnL</i> | <i>rrnS</i> |
| <i>Ancylostoma caninum</i>              | NC_012309   | 13,717       | 600         | 1578        | 696         | 776         | 1113        | 870         | 846         | 336         | 1230        | 234          | 1582        | 432         | 963         | 694         |
| <i>Ancylostoma ceylanicum</i>           | AP017674    | 13,655       | 600         | 1587        | 696         | 766         | 1113        | 872         | 846         | 336         | 1230        | 234          | 1588        | 435         | 960         | 683         |
| <i>Ancylostoma duodenale</i>            | NC_003415   | 13,721       | 600         | 1577        | 696         | 766         | 1112        | 873         | 846         | 336         | 1230        | 234          | 1579        | 435         | 960         | 697         |
| <i>Ancylostoma tubaeforme</i>           | NC_034289   | 13,730       | 600         | 1578        | 696         | 766         | 1112        | 873         | 846         | 336         | 1230        | 234          | 1576        | 435         | 958         | 697         |
| <i>Aelurostrongylus abstrusus</i>       | NC_019571   | 13,913       | 600         | 1578        | 693         | 772         | 1104        | 867         | 855         | 339         | 1230        | 237          | 1602        | 426         | 961         | 697         |
| <i>Angiostrongylus cantonensis</i>      | AP017672    | 13,506       | 600         | 1617        | 693         | 766         | 1110        | 876         | 849         | 336         | 1230        | 232          | 1582        | 426         | 957         | 724         |
| <i>Angiostrongylus costaricensis</i>    | AP017675    | 13,645       | 600         | 1587        | 693         | 766         | 1110        | 873         | 848         | 334         | 1230        | 232          | 1585        | 429         | 968         | 698         |
| <i>Angiostrongylus vasorum</i>          | NC_018602   | 13,422       | 600         | 1575        | 699         | 771         | 1110        | 879         | 846         | 336         | 1224        | 233          | 1567        | 429         | 962         | 697         |
| <i>Chabertia erschowi</i>               | NC_023782   | 13,705       | 600         | 1578        | 696         | 766         | 1113        | 873         | 846         | 339         | 1230        | 234          | 1582        | 435         | 970         | 696         |
| <i>Chabertia ovina</i>                  | GQ888721    | 13,682       | 597         | 1578        | 696         | 771         | 1113        | 873         | 840         | 336         | 1233        | 234          | 1582        | 431         | 962         | 700         |
| <i>Hypodontus macropi</i>               | KF361317    | 13,655       | 600         | 1572        | 696         | 766         | 1115        | 855         | 849         | 336         | 1200        | 234          | 1661        | 435         | 960         | 701         |
| <i>Macropicola ocydromi</i>             | KF361320    | 13,659       | 600         | 1572        | 696         | 766         | 1113        | 855         | 834         | 339         | 1206        | 234          | 1561        | 429         | 960         | 701         |
| <i>Oesophagostomum asperum</i>          | KC715826    | 13,672       | 600         | 1578        | 696         | 766         | 1113        | 873         | 846         | 336         | 1230        | 234          | 1582        | 435         | 964         | 697         |
| <i>Oesophagostomum columbianum</i>      | KC715827    | 13,561       | 599         | 1577        | 696         | 766         | 1111        | 873         | 845         | 336         | 1230        | 234          | 1582        | 435         | 961         | 694         |
| <i>Oesophagostomum quadrispinulatum</i> | FM161883    | 13,681       | 600         | 1578        | 696         | 766         | 1113        | 873         | 846         | 336         | 1230        | 234          | 1582        | 435         | 961         | 699         |
| <i>Oesophagostomum dentatum</i>         | FM161882    | 13,752       | 600         | 1578        | 696         | 766         | 1113        | 873         | 846         | 336         | 1230        | 234          | 1582        | 435         | 966         | 700         |
| <i>Cooperia oncophora</i>               | AY265417    | 13,636       | 600         | 1581        | 699         | 766         | 1111        | 871         | 835         | 334         | 1230        | 234          | 1582        | 438         | 949         | 696         |
| <i>Dictyocaulus eckerti</i>             | NC_019809   | 13,300       | 585         | 1575        | 690         | 795         | 1081        | 825         | 825         | 315         | 1170        | 232          | 1567        | 417         | 960         | 701         |
| <i>Dictyocaulus viviparus</i>           | NC_019810   | 13,310       | 600         | 1581        | 687         | 774         | 1078        | 883         | 817         | 336         | 1227        | 235          | 1570        | 438         | 962         | 697         |
| <i>Parafilaroides normani</i>           | KJ801815    | 13,414       | 594         | 1572        | 696         | 766         | 1103        | 830         | 859         | 348         | 1191        | 258          | 1511        | 435         | 962         | 697         |
| <i>Haemonchus placei</i>                | AP017687    | 14,251       | 600         | 1582        | 693         | 766         | 1113        | 846         | 870         | 342         | 1230        | 232          | 1582        | 446         | 946         | 715         |
| <i>Mecistocirrus digitatus</i>          | NC_013848   | 15,221       | 600         | 1576        | 699         | 772         | 1111        | 873         | 846         | 336         | 1230        | 234          | 1582        | 432         | 959         | 700         |
| <i>Teladorsagia circumcincta</i>        | GQ888720    | 14,066       | 600         | 1578        | 696         | 769         | 1111        | 873         | 840         | 336         | 1212        | 232          | 1579        | 438         | 959         | 700         |
| <i>Haemonchus contortus</i>             | EU346694    | 14,055       | 600         | 1582        | 693         | 769         | 1113        | 873         | 846         | 336         | 1220        | 232          | 1582        | 441         | 952         | 703         |

---

|                                      |           |        |     |      |     |     |      |     |     |     |      |     |      |     |     |     |
|--------------------------------------|-----------|--------|-----|------|-----|-----|------|-----|-----|-----|------|-----|------|-----|-----|-----|
| <i>Metastrongylus pudendotectus</i>  | NC_013813 | 13,793 | 603 | 1575 | 696 | 771 | 1116 | 924 | 850 | 342 | 1221 | 240 | 1586 | 437 | 959 | 700 |
| <i>Metastrongylus salmi</i>          | GQ888715  | 13,778 | 597 | 1575 | 696 | 771 | 1113 | 891 | 853 | 342 | 1230 | 234 | 1584 | 438 | 959 | 700 |
| <i>Nematodirus oiratianus</i>        | KF573750  | 13,765 | 598 | 1576 | 694 | 766 | 1113 | 867 | 838 | 327 | 1230 | 229 | 1582 | 438 | 962 | 696 |
| <i>Nematodirus spathiger</i>         | KF573749  | 13,591 | 600 | 1576 | 696 | 766 | 1112 | 867 | 839 | 327 | 1230 | 229 | 1582 | 438 | 958 | 695 |
| <i>Protostrongylus rufescens</i>     | KF481953  | 13,619 | 600 | 1572 | 693 | 775 | 1104 | 876 | 848 | 336 | 1230 | 234 | 1575 | 426 | 960 | 684 |
| <i>Coronocyclus labiatus</i>         | MH551242  | 13,827 | 600 | 1578 | 696 | 766 | 1110 | 873 | 846 | 336 | 1230 | 234 | 1584 | 435 | 979 | 701 |
| <i>Cyathostomum pateratum</i>        | NC_038070 | 13,822 | 600 | 1575 | 696 | 766 | 1113 | 873 | 846 | 336 | 1230 | 234 | 1584 | 435 | 976 | 698 |
| <i>Cylicocyclus ashworthi</i>        | NC_046711 | 13,876 | 600 | 1578 | 696 | 766 | 1113 | 873 | 846 | 336 | 1230 | 234 | 1584 | 435 | 978 | 711 |
| <i>Cylicocyclus insignis</i>         | NC_013808 | 13,828 | 600 | 1578 | 696 | 769 | 1113 | 873 | 846 | 336 | 1230 | 234 | 1584 | 435 | 959 | 700 |
| <i>Cylicocyclus nassatus</i>         | NC_032299 | 13,846 | 600 | 1578 | 696 | 766 | 1113 | 873 | 846 | 336 | 1230 | 234 | 1584 | 435 | 974 | 699 |
| <i>Cylicodontophorus bicoronatus</i> | MH551241  | 13,753 | 600 | 1578 | 696 | 766 | 1113 | 873 | 846 | 336 | 1230 | 234 | 1584 | 435 | 982 | 702 |
| <i>Poteriostomum imparidentatum</i>  | NC_035005 | 13,817 | 600 | 1578 | 696 | 766 | 1113 | 873 | 846 | 336 | 1227 | 234 | 1584 | 435 | 983 | 709 |
| <i>Strongylus equinus</i>            | KM605251  | 14,545 | 600 | 1578 | 696 | 766 | 1113 | 879 | 846 | 336 | 1230 | 234 | 1599 | 435 | 959 | 708 |
| <i>Strongylus vulgaris</i>           | GQ888717  | 14,301 | 603 | 1578 | 696 | 766 | 1116 | 876 | 846 | 336 | 1230 | 234 | 1584 | 435 | 959 | 700 |
| <i>Triodontophorus brevicauda</i>    | NC_026729 | 14,305 | 600 | 1578 | 696 | 766 | 1113 | 873 | 846 | 336 | 1230 | 234 | 1584 | 435 | 975 | 703 |
| <i>Triodontophorus nipponicus</i>    | NC_031517 | 13,701 | 600 | 1578 | 696 | 766 | 1113 | 873 | 846 | 336 | 1230 | 234 | 1584 | 435 | 976 | 696 |
| <i>Triodontophorus serratus</i>      | NC_031516 | 13,794 | 600 | 1578 | 696 | 766 | 1113 | 873 | 846 | 336 | 1230 | 234 | 1584 | 435 | 961 | 701 |
| <i>Cylicostephanus goldi</i>         | AP017681  | 13,827 | 600 | 1578 | 696 | 766 | 1113 | 873 | 846 | 336 | 1230 | 234 | 1593 | 435 | 972 | 699 |
| <i>Syngamus trachea</i>              | NC_013821 | 14,647 | 600 | 1578 | 696 | 775 | 1116 | 873 | 849 | 324 | 1230 | 234 | 1582 | 435 | 959 | 700 |
| <i>Trichostrongylus axei</i>         | NC_013824 | 13,653 | 600 | 1578 | 693 | 769 | 1113 | 864 | 846 | 336 | 1227 | 234 | 1582 | 435 | 959 | 700 |
| <i>Trichostrongylus vitrinus</i>     | NC_013807 | 13,800 | 597 | 1578 | 693 | 766 | 1113 | 864 | 846 | 336 | 1227 | 234 | 1582 | 435 | 959 | 700 |

---

**Table S3.** List of the nine primer pairs for PCR amplification and their positions in *V. eleguneniensis* mtDNA.

| Primer Name | Location in<br><i>V. eleguneniensis</i> mtDNA | Primer Sequence (5' to 3')          |
|-------------|-----------------------------------------------|-------------------------------------|
| VE-1        | 13,435-13,454                                 | Forward: GGTGAAATGTTAAATAGAGT       |
|             | 1232-1255                                     | Reverse: TTACTAAAGAACTAGTTAAACTTA   |
| VE-2        | 918-941                                       | Forward: GTCTGTGTTGGCTAAATTAAATAA   |
|             | 2312-2335                                     | Reverse: GCGCACCAAAACCTAAGATTATAA   |
| VE-3        | 2070-2095                                     | Forward: AGGTATGTCAATATTAAATAATATTT |
|             | 3462-3485                                     | Reverse: ATAATAGAATTATATAACTGACCA   |
| VE-4        | 3112-3133                                     | Forward: GTTTGTTTCGTGTATGGGAAAAA    |
|             | 5221-5244                                     | Reverse: CCCCTCTTATCAACAACAAAAATC   |
| VE-5        | 4836-4857                                     | Forward: TTATTTTAGTAGAAGTAGTTTA     |
|             | 6999-7024                                     | Reverse: CCCACAAATATAACAATTTCTAAATC |
| VE-6        | 6748-6771                                     | Forward: ATTAGTACGAAAGGAAAGTTAATT   |
|             | 8399-8422                                     | Reverse: CTAGGTATTCCAATTATATTAACA   |
| VE-7        | 8274-8293                                     | Forward: CGTCTGTGAAAAAGTTTTTT       |
|             | 10,580-10,604                                 | Reverse: CCCCTAAATCTACTTTACTACAAC   |
| VE-8        | 10,406-10,428                                 | Forward: AGATATATATTTAGTTTATAAAT    |
|             | 11,904-11,928                                 | Reverse: TTCCACAAACACAAAAAGAATAAGA  |
| VE-9        | 11,763-11,785                                 | Forward: GGGATTTTGAGTGTGTTTTTTGA    |
|             | 13,519-13,538                                 | Reverse: CCCCCCTTTACACCAAAAAAT      |
